# Supplementary material for: Axial impairment and falls in Parkinson’s disease: 15 years of subthalamic deep brain stimulation
Source: Springer Nature journal article supplement (doi:10.1038/s41531-022-00383-y), 2022-09-24
Supplement: 41531_2022_383_MOESM1_ESM.pdf [file 41531_2022_383_MOESM1_ESM.pdf]

**Supplementary Table 1.** Preoperative demographic and clinical features of people with Parkinson’s disease and subthalamic deep brain stimulation at baseline and follow-ups

| Variable                                     | Values n (%); mean [±SD]; Median {range}                                          |                                                                                   |                                                                                  |
|----------------------------------------------|-----------------------------------------------------------------------------------|-----------------------------------------------------------------------------------|----------------------------------------------------------------------------------|
|                                              | Baseline and 1-year follow-up <sup>1</sup>                                        | 10-year follow-up                                                                 | 15-year follow-up                                                                |
| <b>Patients (N) and Sex</b>                  | 302 (183 Male, 60.6%; 119 Female, 39.4%)                                          | 102 (63 Male, 61.8%; 39 Female, 38.2%)                                            | 57 (36 Male, 63.2%; 21 Female 36.8%)                                             |
| <b>Age at disease onset</b>                  | 43.96 [±8.18]; 44 {19.00-62.00}                                                   | 40.77 [±7.64]; 41 {24.00-61.00}                                                   | 39.67 [±7.16]; 40 {24.00-56.00}                                                  |
| <b>Age at surgery (y)</b>                    | 55.61 [±8.42]; 56.00 {29.00-74.00}                                                | 53.36 [±8.47]; 53.50 {31.00-70.00}                                                | 50.79 [±8.33]; 53.00 {31.00-69.00}                                               |
| <b>Disease duration at surgery (y)</b>       | 11.75 [±4.27]; 12.00 {2.00-27.00}                                                 | 12.41 [±4.37]; 12.00 {4.00-24.00}                                                 | 11.17 [±3.68]; 11.00 {5.00-21.00}                                                |
| <b>Clinical phenotype</b>                    | 109 AR (36.1%); 40 T (13.2%);<br>151 Mixed (50.0%)                                | 37 AR (36.3%); 10 T (9.8%);<br>55 Mixed (53.9%)                                   | 18 AR (31.6%); 6 T (10.5%);<br>33 Mixed (57.9%)                                  |
| <b>WMH on brain MRI</b>                      | No 195 (64.6%); Yes 37 (12.3%);<br>Missing data 70 (23.2%)                        | No 59 (57.8%); Yes 8 (7.8%);<br>Missing data 35 (34.3%)                           | No 45 (78.9%); Yes 7 (12.3%);<br>Missing data 5 (8.8%)                           |
| <b>Baseline UPDRS-I</b>                      | 1.94 [±1.57]; 2.00 {0.00-8.00}                                                    | 1.98 [±1.53]; 2.00 {0.00-7.00}                                                    | 2.03 [±1.41]; 2.00 {0.00-5.00}                                                   |
| <b>Baseline UPDRS-II</b>                     | OFF: 24.41 [±7.32]; 24.00 {3.00-42.00}<br>ON: 5.87 [±4.54]; 5.00 {0.00-23.50}     | OFF: 24.50 [±6.82]; 25.00 {8.00-40.00}<br>ON: 5.52 [±4.35]; 4.50 {0.00-23.50}     | OFF: 23.77 [±6.52]; 24.00 {8.00-37.00}<br>ON: 5.02 [±4.26]; 4.00 {0.00-15.00}    |
| <b>Baseline UPDRS-III</b>                    | OFF: 45.26 [±15.41]; 43.00 {13.00-91.50}<br>ON: 13.76 [±7.98]; 12.00 {1.00-46.00} | OFF: 47.08 [±15.91]; 47.25 {15.50-91.50}<br>ON: 13.06 [±8.17]; 11.25 {1.00-45.00} | OFF: 43.42 [±12.83]; 43.50 {15.50-71.00}<br>ON: 10.93 [±6.77]; 9.00 {1.00-30.00} |
| <b>Baseline UPDRS-IV</b>                     | 9.54 [±3.14]; 9.00 {0.00-17.00}                                                   | 9.76 [±3.25]; 10.00 {3.00-17.00}                                                  | 10.44 [±3.13]; 11.00 {3.00-16.00}                                                |
| <b>Baseline Hoehn &amp; Yahr</b>             | OFF: 3.35 [±0.99]; 3.00 {1.50-5.00}<br>ON: 1.86 [±0.76]; 2.00 {0.00-3.00}         | OFF: 3.42 [±0.91]; 4.00 {2.00-5.00}<br>ON: 1.70 [±0.77]; 2.00 {0.00-3.00}         | OFF: 3.25 [±0.87]; 3.00 {2.00-5.00}<br>ON: 1.55 [±0.77]; 2.00 {0.00-2.50}        |
| <b>Baseline axial score</b>                  | OFF: 6.82 [±3.94]; 6.00 {0.00-16.00}<br>ON: 1.94 [±1.80]; 1.50 {0.00-10.00}       | OFF: 6.65 [±3.44]; 6.00 {0.00-16.00}<br>ON: 1.67 [±1.65]; 1.00 {0.00-8.00}        | OFF: 5.53 [±2.64]; 5.00 {0.00-12.00}<br>ON: 1.22 [±1.15]; 1.00 {0.00-5.00}       |
| <b>Baseline axial response to L-Dopa (%)</b> | 69.50 [±23.79]; 71.00 {0.00-100.00}                                               | 74.26 [±23.52]; 80.00 {0.00-100.00}                                               | 76.73 [±21.79]; 81.50 {25.00-100.00}                                             |
| <b>Baseline MDRS</b>                         | 137.43 [±5.04]; 139.00 {122.00-144.00}                                            | 137.16 [±4.93]; 139.00 {124.00-144.00}                                            | 137.41 [±5.08]; 139.00 {125.00-144.00}                                           |
| <b>Baseline frontal score</b>                | 38.96 [±7.87]; 40.00 {17.60-50.00}                                                | 39.99 [±6.82]; 40.05 {26.00-50.00}                                                | 40.82 [±6.87]; 42.00 {26.00-50.00}                                               |
| <b>Baseline BDI-II</b>                       | 11.58 [±7.36]; 10.00 {0.00-42.00}                                                 | 11.67 [±7.31]; 10.00 {0.00-37.00}                                                 | 12.17 [±7.08]; 11.00 {0.00-37.00}                                                |
| <b>Baseline LEDDs</b>                        | 1347.67 [±505.86]; 1340.00<br>{265.00-3200.00}                                    | 1375.64 [±427.13]; 1364.00<br>{554.00-2479.00}                                    | 1341.24 [±436.92]; 1250.00<br>{555.00-2347.00}                                   |

AR: akinetic-rigid; BDI: Beck depression inventory; LEDDs: L-Dopa equivalent daily doses; MDRS: Mattis dementia rating scale; MRI: magnetic resonance imaging; OFF: not under dopaminergic therapy; ON: under dopaminergic therapy; T: tremorigen; UPDRS: unified Parkinson’s disease rating scale; WMH: white matter hyperintensities. <sup>1</sup>All subjects at baseline were also included at the 1-year follow-up.

## Supplementary Data 1. STROBE Statement - checklist of items for reports of cohort studies

|                              | Item No | Recommendation                                                                                                                                                                                                                                                                                                         | Page No          |
|------------------------------|---------|------------------------------------------------------------------------------------------------------------------------------------------------------------------------------------------------------------------------------------------------------------------------------------------------------------------------|------------------|
| <b>Title and abstract</b>    | 1       | (a) Indicate the study's design with a commonly used term in the title or the abstract<br>(b) Provide in the abstract an informative and balanced summary of what was done and what was found                                                                                                                          | 3<br>(a,b)       |
| <b>Introduction</b>          |         |                                                                                                                                                                                                                                                                                                                        |                  |
| Background/rationale         | 2       | Explain the scientific background and rationale for the investigation being reported                                                                                                                                                                                                                                   | 4-5              |
| Objectives                   | 3       | State specific objectives, including any prespecified hypotheses                                                                                                                                                                                                                                                       | 5                |
| <b>Methods</b>               |         |                                                                                                                                                                                                                                                                                                                        |                  |
| Study design                 | 4       | Present key elements of study design early in the paper                                                                                                                                                                                                                                                                | 5                |
| Setting                      | 5       | Describe the setting, locations, and relevant dates, including periods of recruitment, exposure, follow-up, and data collection                                                                                                                                                                                        | 14               |
| Participants                 | 6       | (a) Give the eligibility criteria, and the sources and methods of selection of participants. Describe methods of follow-up<br>(b) For matched studies, give matching criteria and number of exposed and unexposed                                                                                                      | 14-15<br>(a)     |
| Variables                    | 7       | Clearly define all outcomes, exposures, predictors, potential confounders, and effect modifiers. Give diagnostic criteria, if applicable                                                                                                                                                                               | 14-16            |
| Data sources/<br>measurement | 8*      | For each variable of interest, give sources of data and details of methods of assessment (measurement). Describe comparability of assessment methods if there is more than one group                                                                                                                                   | 14-17            |
| Bias                         | 9       | Describe any efforts to address potential sources of bias                                                                                                                                                                                                                                                              | 14-17            |
| Study size                   | 10      | Explain how the study size was arrived at                                                                                                                                                                                                                                                                              | 5, 14            |
| Quantitative variables       | 11      | Explain how quantitative variables were handled in the analyses. If applicable, describe which groupings were chosen and why                                                                                                                                                                                           | 14-17            |
| Statistical methods          | 12      | (a) Describe all statistical methods, including those used to control for confounding<br>(b) Describe any methods used to examine subgroups and interactions<br>(c) Explain how missing data were addressed<br>(d) If applicable, explain how loss to follow-up was addressed<br>(e) Describe any sensitivity analyses | 14-17<br>(a,b,c) |
| <b>Results</b>               |         |                                                                                                                                                                                                                                                                                                                        |                  |
| Participants                 | 13*     | (a) Report numbers of individuals at each stage of study—eg numbers potentially eligible, examined for eligibility, confirmed eligible, included in the study, completing follow-up, and analysed<br>(b) Give reasons for non-participation at each stage<br>(c) Consider use of a flow diagram                        | 5-6<br>(a,b)     |
| Descriptive data             | 14*     | (a) Give characteristics of study participants (eg demographic, clinical, social) and information on exposures and potential confounders<br>(b) Indicate number of participants with missing data for each variable of interest<br>(c) Summarise follow-up time (eg, average and total amount)                         | 5-7<br>(a,b,c)   |
| Outcome data                 | 15*     | Report numbers of outcome events or summary measures over time                                                                                                                                                                                                                                                         | 5-7              |

|                          |    |                                                                                                                                                                                                                                                                                                                                                                                                               |                |
|--------------------------|----|---------------------------------------------------------------------------------------------------------------------------------------------------------------------------------------------------------------------------------------------------------------------------------------------------------------------------------------------------------------------------------------------------------------|----------------|
| Main results             | 16 | (a) Give unadjusted estimates and, if applicable, confounder-adjusted estimates and their precision (eg, 95% confidence interval). Make clear which confounders were adjusted for and why they were included<br>(b) Report category boundaries when continuous variables were categorized<br>(c) If relevant, consider translating estimates of relative risk into absolute risk for a meaningful time period | 5-7<br>(a,b,c) |
| Other analyses           | 17 | Report other analyses done—eg analyses of subgroups and interactions, and sensitivity analyses                                                                                                                                                                                                                                                                                                                | 7              |
| <b>Discussion</b>        |    |                                                                                                                                                                                                                                                                                                                                                                                                               |                |
| Key results              | 18 | Summarise key results with reference to study objectives                                                                                                                                                                                                                                                                                                                                                      | 7-8            |
| Limitations              | 19 | Discuss limitations of the study, taking into account sources of potential bias or imprecision. Discuss both direction and magnitude of any potential bias                                                                                                                                                                                                                                                    | 12-13          |
| Interpretation           | 20 | Give a cautious overall interpretation of results considering objectives, limitations, multiplicity of analyses, results from similar studies, and other relevant evidence                                                                                                                                                                                                                                    | 7-14           |
| Generalisability         | 21 | Discuss the generalisability (external validity) of the study results                                                                                                                                                                                                                                                                                                                                         | 7-14           |
| <b>Other information</b> |    |                                                                                                                                                                                                                                                                                                                                                                                                               |                |
| Funding                  | 22 | Give the source of funding and the role of the funders for the present study and, if applicable, for the original study on which the present article is based                                                                                                                                                                                                                                                 | 18             |
